# Supplementary material for: A hierarchical cellular structural model to unravel the universal power-law rheological behavior of living cells
Source: PubMed Central journal article supplement (PMC8523554; doi:10.1038/s41467-021-26283-y), 2021-10-18
Supplement: 41467_2021_26283_MOESM3_ESM.pdf [file 41467_2021_26283_MOESM3_ESM.pdf]

## **Description of Additional Supplementary Files**

File Name: Supplementary Software 1

Description: The folder contains three files:

The ModelScripts.py is the code file for modelling, which is suitable for running on Abaqus 6.13-1.

The readme.txt file gives the instructions for running the code.

The Parameters In the Model.pptx gives the physical meaning of the parameters those are entered in the code.
